# Supplementary material
Source: publisher figshare collection journal article supplement (https://karger.figshare.com/ndownloader/files/28961871)
Supplement: Supplementary file 1 [file 28961871]

**Appendix 1**: Supplementary Materials and Methods

## Identification of studies

Two complementary approaches were used to search for studies using the IENT questionnaire: a bibliographic search and an author survey with a snowball effect (shown in Fig. 1).

*Bibliographic search*

Published papers and gray literature using the IENT questionnaire were searched in international (n=2) and local bibliographic databases (n=4) (Figure 1). Depending on the database, different strategies were implemented. First, research queries were used with SciELO (“epilepsia AND cuestionario”; “epilepsia AND encuesta”) and the Institute of Epidemiology and Tropical Neurology (“questionnaire ET épilepsie”) databases. Second, research through citations was conducted with Google Scholar and Web Of Science, based on reference publications of the IENT questionnaire: *Preux et al., 2000, Preux et al., 2003* and *Diagana et al., 2006.* A third method was used in cases where previous strategies could not be applied: titles of all references were read in the African Journal of Neurological Sciences and Neurology Asia databases. All studies on epilepsy were kept for the selection process. A list of the studies contained in the first assessment of the IENT questionnaire in 2011 was also drawn up and was consulted after reading the full texts in case those documents had not yet been identified (manual search).

*Complementary author survey*

Simultaneously, the authors who used the IENT questionnaire and were identified through the bibliographic search were contacted (Figure 1). The survey was initially sent to the first author, then to the first, second and last authors as reminders (round 2 and 3). We carried out this survey to obtain data that could not be found in the articles, such as opinions about the tool and details of use in each study. Furthermore, the authors were asked to mention colleagues who may have used the IENT questionnaire (snowball effect). These newly identified authors were contacted to participate in the survey and their research studies were searched in the bibliographic databases. The survey was available in both French and English. It was conducted between September and October 2019 using LimeSurvey© software.

**Appendix 2**: Characteristics of studies that used the “Questionnaire for investigation of epilepsy in tropical countries”. **2A**: Methodological characteristics of surveys, **2B**: Description of participants, **2C:** Quality of studies

| **AUTHORS** | **TOPICS** | **STUDY DESIGN** | **COUNTRY** | **URBAN / RURAL** | **DEFINITION OF EPILEPSY** | **CLASSIFICATION OF EPILEPSY** | **SUPPLEMENT TOOLS** |
| --- | --- | --- | --- | --- | --- | --- | --- |
| **Kabre, 1998** (15) | Associated factors; Prevalence | Cross-sectional; Here-somewhere | Burkina Faso | Rural | At least two seizure outsite of acute infection | ILAE., 1989 | / |
| **Druet-Cabanac et al., 1999** (16) | Associated factors | Matched cases-controls | Central African Republic | Urban & Rural | At least two unprovocked seizures (ILAE., 1989) | ILAE., 1989 | / |
| **Debrock et al., 2000** (17) | Prevalence | Cross-sectional | Benin | Rural | At least two epileptic seizures in life | ILAE., 1989 | / |
| **Farnarier et al., 2000** (18) | Associated factors; Prevalence | Cross-sectional; Here-somewhere; Matched cases-controls | Mali | Rural | / | / | / |
| **Preux et al., 2000** (19) | Treatments | Cross-sectional | Cameroon | Urban & Rural | At least two unprovoked seizures unrelated to intercurrent events (ILAE) | / | Questionnaire of knowledge and accessibility to treatments (patients), questionnaire on attitudes and prescriptions (physicians), on stocks of antiepileptics, frequency of dispensing and restocking and methods of delivery (pharmacists) |
| **Balogou et al., 2001** (20) | Prevalence | Cross-sectional | Togo | Urban & Rural | At least two seizures in the year preceding the survey | ILAE., 1993 | / |
| **Traore et al., 2001** (21) | Cases report | Cohort | Mauritania | Urban | At least two epileptic seizures in life | ILAE., 1981 | / |
| **Avode et al., 2003** (22) | Prevalence | Cross-sectional | Benin | Urban | At least two epileptic seizures in life | ILAE., 1981 | / |
| **Dongmo et al., 2003 et 2004 (a,b) ; Njamnshi et al., 2007 ©** (23-25) | Treatments (a); Associated factors (b) ; Prevalence © | Cohort (a) ; Matched cases-controls (b) ; Cross-sectional © | Cameroon | Rural | At least two seizures outside of acute infection (ILAE., 1993) | ILAE., 1981 | / |
| **Millogo et al., 2003** (26) | Treatments | Cohort | Burkina Faso | Urban | / | ILAE., 1981 | / |
| **Nsengiyumva et al., 2003 (a); Diagana et al., 2005 (b) ; Nicoletti et al., 2007 (c) ; Prado-Jean et al., 2007 (d)** (27-30) | Associated factors (a,c,d) ; Cases report (b) | Matched cases-controls (a,c,d) ; Cross-sectional (b) | Burundi | Rural | At least two unexplained, unprovoked seizures occurring within a time range >24 (ILAE., 1993). At least one seizure in the past five years | ILAE., 1989 (a,c) & ILAE., 1981 (b, c) | EEG interpretation schedule |
| **Andriantseheno et al., 2004** (31) | Prevalence | Cross-sectional | Madagascar | Urban | At least one unprovoked afebrile seizure in the last 5 years treated or not (ILAE., 1993) | ILAE., 1981 | / |
| **Nkwetngam Ndam., 2004 (a) ; Sehoue., 2004 (b) ; Goudjinou., 2004 ©** (32-34) | Associated factors (a) ; Treatments (b) ; Comorbidities © | Cross-sectional | Benin | Rural | At least two epileptic seizures in the lifetime | / | Nutritional aspects questionnaire (a); therapeutic pathways questionnaire (physicians, pharmacists and traditipractitioners) (b); Temperament and Character Inventory (TCI) © |
| **Nubukpo., 2004** (35) | Comorbidities | Cross-sectional; Matched cases-controls | Benin | Urban | At least two seizures with or without electrographic signs | / | Goldberg Anxiety and Depression Scale (GADS) |
| **Wadgi et al., 2004** (36) | Treatments | Before-After | Egypt | Urban | / | ILAE., 1981 | Health education: washing, brushing and rinsing fruits and vegetables under running water. |
| **Dent et al., 2005** (37) | Prevalence | Cross-sectional | Tanzania | Rural | At least two afebrile seizures. At least one unprovoked seizure during the past five years | ILAE., 1989 | WHO modified questionnaire (screening) |
| **Diagana et al., 2006** (38) | Validation study | Cases-controls; Cross-sectional | Mauritania | Urban | At least two unprovoked seizures occurring within a time range of >24 h (ILAE., 1993) | / | / |
| **Ngoungou et al., 2006** (39) | Associated factors | Matched cases-controls | Gabon | Urban | At least two unprovoked seizures occurring within a time range of >24 h (ILAE., 1993) | ILAE., 1981 | / |
| **Ngoungou et al., 2006** (40) | Risk factors | Cohort | Mali | Urban | At least two unprovoked seizures occurring within a time range of >24 h (ILAE., 1993) | ILAE., 1981 | / |
| **Tran et al., 2006 et 2007** (41,42) | Prevalence ; Associated factors | Cross-sectional; Matched cases-controls | Lao | Rural | At least two epileptic seizures unprovoked by any immediate identified cause. If at least one unprovoked seizure had occurred during the last 5 years or under anti-epileptic treatment (ILAE., 1993) | ILAE., 1981 | / |
| **Houinato et al., 2007** (43) | Prevalence | Cross-sectional | Benin | Urban | At least two unprovoked seizures occurring within a time range of >24 h (ILAE., 1993) | ILAE., 1981 | / |
| **Ocquet et al., 2007** (44) | Cases report; Prevalence | Cross-sectional | Niger | Urban | / | ILAE., 1989 | / |
| **Praud., 2007 ; Mongo., 2008 ; Saphou Damon., 2008** (45-47) | Prevalence; Sociocultural representations | Cross-sectional; Matched cases-controls | Gabon | Urban & Rural | At least two unprovoked seizures occurring within a time range of >24 h (ILAE., 1993) | ILAE., 1981 | Jacoby scale, Sociocultural representations questionnaire |
| **Balogou et al., 2007 et 2008** (48,49) | Prevalence; Treatment; Cases report | Cross-sectional; Longitudinal | Togo | Rural | At least one seizure last year (ILAE., 1993) | ILAE., 1981 | Attitudes, practices and behavior questionnaire, sensitization (documents, television, radio, newspapers, training health workers) (a) ; Goldberg Anxiety and Depression Scale (GADS) (b) |
| **Crépin et al., 2007 (a) ; Rafael et al., 2010 (b)** (50,51) | Associated factors ; Stigma/Sociocultural representations | Cross-sectional; Matched cases-controls | Benin | Rural | At least two unprovoked seizures occurring within a time range of >24 h (ILAE., 1993) | ILAE., 1981 | Food and social questionnaires, anthropologic & bioelectrical impedance measures (a); Explanatory Model Interview Catalogue (EMIC), Jacoby scale and Goldberg Anxiety and Depression Scale (GADS) (b) |
| **Prischich et al., 2008** (52) | Associated factors; Prevalence | Cross-sectional; Matched cases-controls | Cameroon | Rural | Two or more unprovoked seizures occurring within a 24-h period (ILAE., 1997). If at least one unprovoked seizure had occurred during the last 5 years preceding that day besides antiepileptic therapy. | ILAE., 1989 | / |
| **Mbelesso et al., 2009** (53) | Stigma/Sociocultural representations | Cross-sectional | Central African Republic | Urban | / | / | KAP questionnaire for pupils |
| **Preux et al., 2011; Bhalla., 2012 ; Bhalla et al., 2013** (54-56) | Prevalence ; Quality of life; Stigma/Sociocultural representations; Treatment ; KAP | Cross-sectional ; Before-After ; Here-somewhere | Cambodia | Rural | At least two epileptic seizures unprovoked by any immediate identified cause (ILAE.,1993) | ILAE., 1981 | Jacoby scale, Quality of life questionnaire (QOLIE-31), KAP questionnaire for patients and general population |
| **Lekoubou et al., 2012** (57) | Associated factors | Matched cases-controls | Cameroon | Rural | Two or more unprovocked seizures with at least one episode recorded within the last 12 months or on recognized anticonvulsivant therapy (ILAE., 1993) | ILAE., 1981 | / |
| **Millogo et al., 2012 (a) ; Nitiéma et al., 2012 (b)** (58,59) | Prevalence ; Associated factors | Cross-sectional (a,b) ; Cases-controls (b) | Burkina Faso | Rural | At least two unprovoked seizures of central nervous system origin, occurring more than 24 hours apart, and confirmed by the study physician through history and neurological evaluation. At least one epileptic seizure during the previous three years or the use of antiepileptic medications for seizures during the three last years. | ILAE., 2006 (Engel et al., 2006) | List of family persons (head of family), Questionnaires on eating habits and hygienic measures (mother of family) |
| **Yemadje et al., 2012** (60) | Prevalence | Cross-sectional | Benin | Urban & Rural | At least two epileptic seizures unprovoked by any immediate identified cause, occurring within a time range of >24 h. If at least one unprovoked seizure had occurred during the last 5 years or under anti-epileptic treatment (ILAE., 1993) | ILAE., 2010 | / |
| **Adoukonou et al., 2013** (61) | Prevalence | Cross-sectional | Benin | Rural | At least two unprovoked seizures (ILAE., 1993 & Fisher et al., 2005) | ILAE., 1981 | / |
| **Doumbia et al., 2013** (62) | Prevalence | Cross-sectional | Ivory Coast | Urban | At least two epileptic seizures | ILAE., 1981 | / |
| **Elliott et al., 2013** (63) | Associated factors | Matched cases-controls | Cameroon | Rural | At least two unexplained and unprovoked seizures occurring within a time range of >24 h | / | Screening questionnaire, Placencia., 1992 |
| **Harimanana et al., 2013** (64) | Treatments | Cross-sectional | Laos | Urban | Under treatment for more than 6 months prior the survey | ILAE., 2010 | Morisky scale (MMAS-4), Jacoby scale |
| **Houinato et al., 2013** (65) | Incidence; Mortality; Prevalence | Cross-sectional; Longitudinal | Benin | Rural | At least two epileptic seizures unprovoked by any immediate identified cause (ILAE.,1993) | ILAE., 1981 | / |
| **Maiga et al., 2013** (66) | KAP | Cross-sectional | Mali | Urban | / | / | Questionnaires of KAP and on driver's licence regulations with links to road accidents |
| **Ngugi et al., 2013** (67) | Associated factors; Prevalence | Cases-controls; Cross-sectional | Kenya, South Africa, Ghana, Tanzania & Uganda | Urban | Two or more unprovoked convulsive seizures occurring at least 24 h apart, with at least one seizure in the preceding 12 months. | / | / |
| **Kuate-Tegueu et al., 2014** (68) | Associated factors | Matched cases-controls | Cameroon | Rural | At least two unprovoked seizures in the past two years | / | / |
| **Maiga et al., 2014** (69) | KAP | Cross-sectional; Matched cases-controls | Mali | Urban | / | / | KAP questionnaire for parents |
| **Chivorakul., 2015** (70) | KAP; Sociocultural representations;Treatments | Before-After; Here-Somewhere | Laos | Urban & Rural | At least two unprovoked seizures occurring within a time range of >24 h (ILAE., 1993) | ILAE., 1981 | KAP questionnaire (general population, health workers, patients and their families), information, education and communication tools (sensibilization and training of health personnel). |
| **Ibinga et al., 2015** (71) | Associated factors; Quality of life | Cross-sectional | Gabon | Urban & Rural | At least two unprovoked seizures occurring within a time range of >24 h (ILAE., 1993) | / | Quality of life questionnaire (5 scales for children and 1 for parents) |
| **Mallum Chindo., 2015** (72) | Cases report; Quality of life | Cross-sectional | Nigeria | Urban | At least two epileptic seizures unprovoked by any immediate identified cause (ILAE.,1993) | ILAE., 2010 | Quality of life questionnaire (QOLIE-10P) |
| **Chentouf., 2016** (73) | Associated factors | Matched cases-controls | Algeria | Urban | At least two unprovoked seizures outside acute events (ILAE., 2014) | ILAE., 2010 | Depression scale for PWE (NDDI-E), genetic profile |
| **Hunter et al., 2016** (74) | Associated factors | Cross-sectional | Tanzania | Rural | At least two unprovoked seizures occurring within a time range of >24 h, occurred during the last 5 years or under anti-epileptic treatment. | ILAE., 2010 | Liverpool Seizure Severity Scale (LSSS) |
| **Siqueira et al., 2016** (75) | Prevalence | Cross-sectional | Brazil | Urban & Rural | At least two unprovoked seizures occurring within a time range of >24 h (ILAE., 1981 & 1989) | ILAE., 1981 & ILAE., 1989 | / |
| **Levick et al., 2017** (76) | Associated factors; Prevalence | Cross-sectional; Matched cases-controls | Democratic Republic of the Congo |  | At least two unprovoked seizures outside acute events (ILAE., 2014) | / | / |
| **Luna et al., 2017** (77) | Associated factors; Sociocultural representations | Cross-sectional | Ecuador | Urban & Rural | / | / | Jacoby scale |
| **Chentouf et al., 2018** (78) | Comorbidities | Case-control study | Algeria | Urban | At least two unprovoked seizures outside acute events (ILAE., 2014) | ILAE., 2010 | Depression criteria (DSM-V), Depression scale for PWE (NDDI-E), Hamilton Rating Scale for Depression (HRSD) |
| **Chesnais et al., 2018** (79) | Incidence | Cohort | Cameroon | Rural | / | ILAE., 2014 | / |
| **Colebunders et al., 2018 (a,b)** (80,81) | Cases report (a) ; Prevalence (b) ;Incidence (b) ; Associated factors (b) | Cross-sectional | South Sudan | Rural | Two or more unprovoked seizures occurring within a 24-h period. If at least one unprovoked seizure had occurred during the last 5 years or under anti-epileptic treatment (ILAE., 2014) | / | Rankin scale (degree of autonomy) |
| **Lenaerts et al., 2018** (82) | Associated factors; Incidence; Prevalence | Cross-sectional | Democratic Republic of the Congo | Rural | At least two unprovoked seizures occurring within a 24-h period, occurred during the last 5 years or under anti-epileptic treatment (ILAE., 2014) | / | / |
| **Mmbando et al., 2018 (a) ; Bhwana., 2019 (b)** (83,84) | Prevalence (a,b) ; Associated factors (a,b) ; Incidence (a) | Cross-sectional | Tanzania | Urban & Rural | At least two unprovoked seizures occurring within a time range of >24 h (ILAE., 2014) | / | / |
| **Siewe Fodjo et al., 2018 et 2019 (a,b) ; Boullé et al., 2019 ©** (85-87) | Prevalence (a,c) ; Incidence (a) ; Cases report (b) ; Associated factors © | Cross-sectional | Cameroon | Rural | At least two unprovoked seizures occurring within a time range of >24 h, outside acute events (ILAE., 2014) | ILAE., 2017 | / |
| **Adoukonou et al., 2019** (88) | Incidence | Cohort | Benin | Urban | At least two confirmed epileptic seizures | / | Questionnaire on strokes (risk factors, clinical status, paraclinical data, complications and progressive factors). |
| **Mbelesso et al., 2019** (89) | Stigma/Sociocultural representations | Cross-sectional | Central African Republic | Rural | At least two unprovoked seizures occurring within a time range of >24 h (ILAE., 1993) | / | / |
| **Mroueh et al., 2019** (90) | Associated factors; Treatments | Cross-sectional | Lebanon | Urban | At least two unprovoked seizures occurring within a time range of >24 h (ILAE., 2014) | / | Morisky scale (MMAS-4), questionnaire on behaviour towards medication |
| **Mukendi et al., 2019 (a) , Siewe Fodjo., 2019 (b)** (91,92) | Associated factors (a, b) ; Prevalence (a) | Cross-sectional (a,b) ; Matched cases-controls (a) | Democratic Republic of the Congo | Rural | At least two unprovoked seizures occurring within a time range of >24 h (ILAE., 2014) | ILAE., 2017 | Growth retardation criteria |
| **Sahlu et al., 2019 (a, b)** (93,94) | Prevalence ; Associated factors (a) ; Validation study (b) | Cases-controls (a) ;Cross-sectional (a,b) | Burkina Faso | Rural | More than one seizure of central nervous system origin without apparent cause in a lifetime (Fisher., 2005) | / | Severe and chronic headache screening questionnaire |
| **Siewe Fodjo et al., 2019** (95) | Prevalence | Cross-sectional | Nigeria | Rural | At least two unprovoked seizures occurring within a time range of >24 h (ILAE., 2014) | / | / |
| **Gumisiriza et al., 2020** (96) | Incidence; Prevalence | Cross-sectional | Uganda | Rural | At least two unprovoked seizures occurring within a time range of >24 h (ILAE., 2014) | / | / |

**Appendix 2B** : Description of participants

| **AUTHORS** | **INVESTIGATION PROCESS** | **POPULATION STUDY** | **AGE CRITERIA** | **SAMPLE SIZE** | **SUSPECTED** | **CONFIRMED** | **PWOE** |
| --- | --- | --- | --- | --- | --- | --- | --- |
| **Kabre, 1998** (15) | Door-to-door survey with selection of villages by simple random sampling. Step 1: Census, Step 2: Skin biopsy, Step 3: Questionnaire with at least one family member (mother). Suspect subjects summoned to the dispensary for complementary examinations | Population based | ≥ 15 years old | 3011 |  | 45 |  |
| **Druet-Cabanac et al., 1999** (16) | Survey in clinics from 3 cities, covering 66 villages. Step 1: Sensitization, Step 2: Screening, Step 3: Confirmation with a neurologist | Community based | ≥ 15 years old |  |  | 187 | 374 |
| **Debrock et al., 2000** (17) | Survey with capture-recapture method (door-to-door, medical and non-medical sources). Step 1: Screening with trained paramedical personnel, Step 2: Diagnosis with a doctor or confirmation by a neurologist for cases from non-medical sources and door-to-door survey. | Population based | Adults & children  (All ages) | 3134 |  | 65 |  |
| **Farnarier et al., 2000** (18) | Door-to-door survey in 18 villages selected through a cluster sampling. Step 1: Census, Step 2: Screening, Step 3: Confirmation with a neurologist + complementary examinations | Population based | < 7 years old | 5243 |  | 70 | 130 |
| **Preux et al., 2000** (19) | Survey conducted in two health districts. Step 1: Patients recruited through a sensitization campaign, Step 2: Confirmation by a neurologist, Step 3: Survey with patients, doctors, pharmacists (private and hospital), distributors and tradipractitioners. | Community based | ≥ 18 years old |  |  | 33 |  |
| **Balogou et al., 2001** (20) | Door-to-door survey in villages and neighbourhoods selected by cluster sampling. Step 1: Screening with doctors, Step 2: Examinations with neurologists (EEG, X-ray) | Population based | Adults & children  (All ages) | 9155 | 304 | 170 |  |
| **Traore et al., 2001** (21) | Prospective collection during consultations at the Neurology Department of the Neuro-psychiatric Centre of Nouakchott. | Hospital based | Adults & children  (All ages ?) |  |  | 150 |  |
| **Avode et al., 2003** (22) | Survey in the 6th administrative zone of Cotonou. Cluster survey at 3 levels: Schools, Classes and Pupils. Confirmation by a neurologist. | Education | Pupils & students | 1400 |  | 11 |  |
| **Dongmo et al., 2003 et 2004 (a,b) ; Njamnshi et al., 2007 ©** (23-25) | Door-to-door survey. Step 1: Screening by trained workers, Step 2: Confirmation by a neurologist, Step 3: Blood samples, Step 4: Treatment initiation and follow-up | Population based | Adults & children  (All ages) | 1900 (b) ; 1898 © | 115 © | 125 (a) ; 93 (b) ; 93 © | 81 (b) |
| **Millogo et al., 2003** (26) | Follow-up of patients received in consultations from 1996 to 2001 (1, 3 and every 6 months) | Hospital based | ≥ 18 years old | 6083 |  | 158 |  |
| **Nsengiyumva et al., 2003 (a); Diagana et al., 2005 (b) ; Nicoletti et al., 2007 (c) ; Prado-Jean et al., 2007 (d)** (27-30) | Step 1: Sensitization with village chiefs for participation in the study, Step 2: Screening, Step 3: Confirmation by a doctor, Step 4: Serological tests + EEGs (recordings at Kiremba hospital and evaluation at the neurology department of Limoges University Hospital). | Community based | Adults & children  (All ages ?) |  |  | 324 (a) ; 250 (b) ; 191 (c) ; 303 (d) | 648 (a) ; 191 (c) ; 606 (d) |
| **Andriantseheno et al., 2004** (31) | Door-to-door survey with two-stage cluster sampling. Step 1: Screening with trained medical students, Step 2: Confirmation by a neurologist | Population based | > 9 years old | 925 | 28 | 25 |  |
| **Nkwetngam Ndam., 2004 (a) ; Sehoue., 2004 (b) ;Goudjinou., 2004 ©** (32-34) | Step 1: Identification of subjects through a door-to-door survey and neurological consultations , Step 2: Confirmation by a neurologist, Step 3: Temperament and Character Inventory (TCI) | Population based | ≥ 15 years old | 78 (a) |  | 39 (a,b) ; 30 © |  |
| **Nubukpo., 2004** (35) | Epileptic cases who have already used the official health facilities. Step 1: Identification sheet, Step 2: Goldberg Anxiety and Depression Scale | Hospital based | ≥ 18 years old |  |  | 98 | 98 |
| **Wadgi et al., 2004** (36) | Epileptic patients with Ascariasis in the Neuropsychiatry Department of "Ras Etin" General Hospital, Alexandria. After inclusion, initiation of anti-helminthic treatment and monthly visits with the neurologist. | Hospital based | Adults & children  (All ages) |  |  | 537 |  |
| **Dent et al., 2005** (37) | Door-to-door survey in the villages of Mnero, Kitandi, Miembeni and Ruvumu. Step 1: Screening with the modified WHO questionnaire, Step 2: Confirmation through neurological examination and IETN questionnaire | Population based | Adults & children  (All ages) | 4905 | 156 | 42 |  |
| **Diagana et al., 2006** (38) | Patients already followed up at the neuro-psychiatric centre in Nouakchott. Step 1: Examination of all subjects with the neurologist, Step 2: Screening with trained investigator, Step 3: Confirmation with the neurologist. | Hospital based | Adults & children  (All ages) | 236 | 131 | 82 | 154 |
| **Ngoungou et al., 2006** (39) | Patients from 3 hospitals in Libreville and confirmed by neurologists. Data obtained with medical records, face-to-face or by telephone using the IETN questionnaire. | Hospital based | Adults & children  (From 6 months to 25 years old) |  |  | 296 | 296 |
| **Ngoungou et al., 2006** (40) | Survey conducted in the Paediatric Department of the Gabriel Touré Hospital in Bamako and the Bandiagara District Hospital in Mali. Step 1: Screening and examination with a doctor, Step 2: Examination of suspect children with a neuropaediatrician. EEGs performed on site and interpreted at the Neurology Department of Limoges University Hospital. | Hospital based | < 15 years old | 323 | 54 | 6 |  |
| **Tran et al., 2006 et 2007** (41,42) | Door-to-door survey in 8 villages in Hinheub district, selected by simple random sampling. Step 1: Screening with trained doctors, Step 2: Confirmation with a neurologist then EEG. Interviews with cases and checks on risk factors, followed by general and neurological examinations and serology. | Population based | Adults & children  (All ages) | 4310 | 277 | 33 ; 31 (b) | 124 (b) |
| **Houinato et al., 2007** (43) | Employees of five companies in Porto-Novo, Cotonou & Lokossa through a simple random sampling. Step 1: Screening; Step 2: Confirmation by a neurologist. Therapeutic management for confirmed cases. | Population based | ≥ 18 years old | 1232 | 46 | 13 |  |
| **Ocquet et al., 2007** (44) | Patients of Barry's office. Step 1: Screening by trained investigators, Step 2: Confirmation by neuropsychiatrist + EEG | Hospital based | Adults & children  (All ages) | 322 |  | 224 |  |
| **Praud., 2007 ; Mongo., 2008 ; Saphou Damon., 2008** (45-47) | Capture-recapture survey (door-to-door, non-medical and medical sources). Step 1: Screening, Step 2: Clinical examination of all subjects and confirmation by a neurologist | Population based | Adults & children  (All ages) | 6251 |  | 51 |  |
| **Balogou et al., 2007 et 2008** (48,49) | Survey conducted in 10 villages in Nadoba District. Step 1: KAP survey, Step 2: Sensitization of the population, Step 3: Door-to-door screening with neurology interns, Step 4: Confirmation via neurological examination + EEG, Step 5: Follow-up + drug treatment (a); Case study with 6 women from odueri (b) | Population based | Adults & children  (All ages ?) | 6249 | 277 (a) ; 6 (b) | 98 |  |
| **Crépin et al., 2007 ; Rafael et al., 2010** (50,51) | Door-to-door survey in 11 villages in the centre of Djidja. Step 1: Screening with trained doctors, Step 2: Confirmation with a neurologist, Step 3: Nutritional and psychological assessments for cases and controls (randomly selected) | Population based | Adults & children  (All ages)  ; ≥ 18 years | 11668 |  | 131 (a) ; 80 (b) | 262 |
| **Prischich et al., 2008** (52) | Door-to-door survey. Step 1: Screening by trained health workers, Step 2: Confirmation by trained physician and neurologists + EEG | Population based | Adults & children  (All ages) | 181 |  | 18 | 36 |
| **Mbelesso et al., 2009** (53) | KAP survey in schools. Classes and students selected by a two-stage stratified sampling. Step 1: KAP questionnaire, Step 2: Screening | Education | Pupils & students | 1799 |  | 5 |  |
| **Preux et al., 2011 (a) ; Bhalla et al., 2013 (b) ; Devender., 2012 ©** 54-56) | Survey in 24 villages selected by random cluster sampling. Door-to-door screening with trained health personnel, Step 2: Confirmation by an epileptologist + EEG, Step 3: Follow-up + drug treatment. | Population based | Adults & children  (All ages) | 16510 | 503 | 96 |  |
| **Lekoubou et al., 2012** (57) | Subjects identified through registers and invited to participate in the community survey. Controls randomly selected from the same population. Stage 1: Diagnosis by physician, Stage 2: All subjects examined by the neurologist | Community based | ≥ 15 years old |  |  | 85 | 85 |
| **Millogo et al., 2012 (a) ; Nitiéma et al., 2012 (b)** (58,59) | Door-to-door survey in 3 villages with different pig rearing methods: (1) free range pigs; (2) most pigs locked up; (3) few pigs. Selection of the inhabitants by a random cluster sampling. Neurological examination with a doctor for suspicious cases. Imaging and serological examinations. | Population based | ≥ 7 ans | 888 | 70 | 39 | 814 (b) |
| **Yemadje et al., 2012** (60) | Door-to-door survey in 12 regions of Benin with selection of districts, villages/cities and blocks by multi-stage cluster sampling. Step 1: Screening with a trained doctor, Step 2: Confirmation with a neurologist. | Population based | ≥ 15 years old | 297 | 174 | 105 |  |
| **Adoukonou et al., 2013** (61) | Door-to-door survey with 2-stage random sampling. Step 1: Screening, Step 2: Collecting disease history, frequency and types of seizures and then treatment data. | Population based | ≥ 15 years old | 1031 | 12 | 7 |  |
| **Doumbia et al., 2013** (62) | Survey in 30 Yopougon schools selected by two-stage stratified sampling. Step 1: Screening, Step 2: Confirmation at the neurology centre + EEG | Education | Pupils & students | 426 | 24 | 15 |  |
| **Elliott et al., 2013** (63) | Epileptic patients recruited through a health centre in Ngie and selection of controls in 19 villages. Step 1: Screening with trained coordinators, Step 2: Examination of all participants with a trained local doctor + blood samples | Population based | Adults & children  (From 5 years and without onset seizure above 60 years old) |  |  | 245 | 245 |
| **Harimanana et al., 2013** (64) | Random selection of key informants (village chiefs and opinion leaders, health personnel, hospital data) for identification of patients with epilepsy. Step 1: Screening, Step 2: Morisky and Jacoby Scales | Community based | Adults & children  (All ages ?) |  |  | 99 |  |
| **Houinato et al., 2013** (65) | Capture-recapture survey (health services, general population and village chiefs). Step 1: Screening, Step 2: Confirmation with a neurologist, Step 3: Follow-up and drug treatment + new cases and deaths | Population based | Adults & children  (All ages) | 11668 | 442 | 148 |  |
| **Maiga et al., 2013** (66) | Door-to-door survey of 31 driving schools in the Bamako district. A semi-structured survey on Malian driving regulations for PWE and attitudes towards epilepsy and the link "epilepsy & accidents of public | Population based | ≥ 18 years old | 568 |  |  |  |
| **Ngugi et al., 2013** (67) | Survey in 5 centres of health and demographic surveillance system. Step 1: Interviews among heads of households, Step 2: Individual interviews, Step 3: Clinical examination | Population based | Adults & children  (All ages) | 586607 | 3075 | 1711 | 996 |
| **Kuate-Tegueu et al., 2014** (68) | Step 1: Identification of epileptic patients through hospital registries. Step 2: Complete the questionnaire | Hospital based | Adults & children  (All ages) |  |  | 70 | 70 |
| **Maiga et al., 2014** (69) | Survey conducted in the Paediatric Department of the Gabriel Touré Hospital in Bamako. Parents and children (with or without epilepsy) were recruited. Semi-structured interviews conducted by trained interviewers with parents during a child's hospitalization or outpatient consultation. | Hospital based | Parents |  |  | 360 | 360 |
| **Chivorakul., 2015** (70) | Identification of suspected cases by key informants (pharmacists, health personnel, village chief, health volunteers and traditional healers). Step 1: Screening with trained investigators, Step 2: Confirmation by a neurologist, Step 3: Classification by a second neurologist | Community based | Adults & children  (All ages) |  |  | 412 |  |
| **Ibinga et al., 2015** (71) | Case identification through key informants, medical data and door-to-door survey. Step 1: Screening with trained interviewers, Step 2: Confirmation by a general practitioner, Step 3: Quality of life questionnaire for children and parents | Population based | Parents & children | 51926 | 317 | 83 |  |
| **Mallum Chindo., 2015** (72) | Epileptic patients at Lagos University Hospital. Step 1: Administration of the questionnaire, Step 2: Clinical examination, Step 3: Quality of life assessment + seizure control | Hospital based | ≥ 15 years old |  |  | 150 |  |
| **Chentouf., 2016** (73) | Identification of patients in specialist consultations for "familial epilepsy". Step 1: Consultation, Step 2: Examinations (EEG, MRI, genetic assessment, psychological comorbidities) | Hospital based | ≥ 15 years old | 303 |  | 101 cases (epileptic patients) and 202 controls |  |
| **Hunter et al., 2016** (74) | Door-to-door survey. Step 1: Screening with Placencia’s questionnaire (1992), Step 2: Confirmation by a doctor, Step 3: Questionnaire on access to care, use of treatments (conventional and traditional) and their costs | Population based | ≥ 15 years old |  |  | 291 |  |
| **Siqueira et al., 2016** (75) | Door-to-door survey. Step 1: Screening with trained health workers, Step 2: Confirmation with a neurologist and pediatric neurologist. | Population based | Adults & children  (All ages) | 30132 | 305 | 241 |  |
| **Levick et al., 2017** (76) | Door-to-door survey of three sites in Ituri province that had never received Ivermectin. Step 1: Screening, Step 2: Confirmation by a doctor | Population based | Adults & children  (All ages) | 12408 |  | 407 | 96 |
| **Luna et al., 2017** (77) | Capture-recapture survey (medical records, key informants, door-to-door survey). Step 1: Interviews with health workers in the primary health care system, Step 2: Screening, Step 3: Confirmation with a neurologist | Population based | Adults & children  (All ages) | 3082 | 461 | 243 |  |
| **Chentouf et al., 2018** (78) | Prospective hospital survey. Step 1: Diagnosis confirmed by clinic + EEG, Step 2: Data collection | Hospital based | ≥ 15 years old | 375 | 43 | 332  (98 depressed and 234 not) |  |
| **Chesnais et al., 2018** (79) | Survey in 7 villages hyperendemic to onchocerciasis between 1991-1993. Step 1: Identification of residences of selected subjects, Step 2: Screening | Population based | ≥ 5 years old | 856 |  | 60 |  |
| **Colebunders et al., 2018 (a,b)** (80,81) | Door-to-door survey in Maridi villages. Step 1: Screening with a trained research assistant, Step 2: Confirmation with a clinical officer or doctor. | Population based | Adults & children  (All ages) | 17652 (b) |  | 736 (a) ; 774 (b) |  |
| **Lenaerts et al., 2018** (82) | Door-to-door survey in randomly selected households within two health zones. Step 1: Screening with trained non-medical personnel, Step 2: Validation of epilepsy by a non-specialist physician, Step 3: Confirmation by a neurologist. | Population based | Adults & children  (All ages) | 1389 | 97 | 64 |  |
| **Mmbando et al., 2018 (a) ; Bhwana., 2019 (b)** (83,84) | Door-to-door survey in three villages. Step 1: Screening by trained community workers, Step 2: Confirmation with a trained neurologist or doctor, Step 3: Onchocerca volvulus serology, Step 4: Drug management of new epileptic patients. | Population based | Adults & children  (All ages) | 5117 (a) ; 8062 (b) | 244 (a) ; 380 (b) | 127 (a) ; 221 (b) |  |
| **Siewe Fodjo et al., 2018 et 2019 (a,b) ; Boullé et al., 2019 (**85-87) | Door-to-door survey in 5 villages Bilomo, Kelleng (a,b) then Bayomen, Ngongol and Nyamongo (b,c). Step 1: Screening with a doctor, Step 2: Confirmation with a neurologist or trained doctor. | Population based | Adults & children  (All ages) | 1525 (a) ; 557 (b) ; 2286 © | 78 (a) ; 166 (b) ; 112 © | 77 (a) ; 156 (b) ; 81 © |  |
| **Adoukonou et al., 2019** (88) | Identification of subjects during post-stroke follow-up visits. Step 1: Screening patients with the neurologist or nurse, Step 2: Confirmation, Step 3: Stroke Follow-Up | Hospital based | ≥ 18 years old | 203 | 22 | 17 |  |
| **Mbelesso et al., 2019** (89) | Door-to-door survey with two-stage stratified sampling. Step 1: Screening with trained medical student, Step 2: Survey on sociocultural representations of epilepsy | Population based | ≥ 10 years old | 1023 |  | 12 |  |
| **Mroueh et al., 2019** (90) | Patients identified in private practices, hospitals and health centres in the capital and suburbs. Face-to-face interviews. | Community based | ≥ 18 years old | 250 |  | 250 |  |
| **Mukendi et al., 2019 (a) , Siewe Fodjo., 2019 (b)** (91,92) | Door-to-door survey. Step 1: Sensitization of participants to participate Step 2: Screening by trained community agents, Step 3: Confirmation by a trained neurologist or doctor, Step 4: Complementary examinations | Population based | Adults & children  (All ages ?) | 2180 | 125 | 65 (a) ; 580 (b) | 65 |
| **Sahlu et al., 2019 (a, b)** (93,94) | Obtaining information from the village chief. Step 1: Screening, Step 2: Confirmation by trained doctors or neurologists, Step 3: Blood sampling | Community based | ≥ 5 years old | 4768 | 337 | 145 (a) ; 147 (b) | 3392 (a) |
| **Siewe Fodjo et al., 2019** (95) | Door-to-door survey. Step 1: Interview with the head of the family, Step 2: Screening, Step 3: Confirmation with a neurologist or doctor | Population based | Adults & children  (All ages) | 843 | 43 | 4 |  |
| **Gumisiriza et al., 2020** (96) | Door-to-door survey. Step 1: Screening with trained health team, Step 2: Clinical and neurological assessments by trained physician or clinical officers. | Population based | Adults & children  (All ages) | 2138 | 163 | 158 |  |

**Appendix 2C:** Quality of studies

| **AUTHORS** | **STUDY DESIGN** | **Selection** | | | | **Comparability** | **Outcome (Cohort / Cross-sectional) Exposure (Case-control)** | | | **TOTAL** |
| --- | --- | --- | --- | --- | --- | --- | --- | --- | --- | --- |
| **1** | **2** | **3** | **4** | **1** | **1** | **2** | **3** |
| **Kabre, 1998** (15) | Cross-sectional | 1 | 0 | 0 | NA | NA | 1 | 0 | NA | 2/6 |
| **Druet-Cabanac et al., 1999** (16) | Case-control | 1 | 0 | 0 | 1 | 2 | 0 | 1 | 0 | 5/9 |
| **Debrock et al., 2000** (17) | Cross-sectional | 1 | 0 | 0 | NA | NA | 2 | 1 | NA | 4/6 |
| **Farnarier et al., 2000** (18) | Case-control | 0 | 1 | 1 | 0 | 2 | 0 | 1 | 0 | 5/9 |
| **Preux et al., 2000** (19) | Cross-sectional | 0 | 0 | 0 | NA | NA | 2 | 1 | NA | 3/6 |
| **Balogou et al., 2001** (20) | Cross-sectional | 1 | 1 | 0 | NA | NA | 2 | 1 | NA | 5/6 |
| **Traore et al., 2001** (21) | Cross-sectional | 0 | 0 | 0 | NA | NA | 2 | 0 | NA | 2/6 |
| **Avode et al., 2003** (22) | Cross-sectional | 1 | 1 | 0 | NA | NA | 2 | 1 | NA | 5/6 |
| **Dongmo et al., 2003 et 2004 (a,b) ; Njamnshi et al., 2007 ©** (23-25) | Cohort (2003) | 0 | NA | 1 | 0 | NA | 0 | 1 | 0 | 2/6 |
| Case-control (2004) | 1 | 1 | 1 | 1 | 1 | 1 | 1 | 0 | 7/9 |
| Cross-sectional (2007) | 1 | 0 | 0 | NA | NA | 2 | 1 | NA | 4/6 |
| **Millogo et al., 2003** (26) | Cohort | 1 | NA | 1 | 0 | NA | 0 | 1 | 0 | 3/6 |
| **Nsengiyumva et al., 2003 (a); Diagana et al., 2005 (b) ; Nicoletti et al., 2007 (c) ; Prado-Jean et al., 2007 (d)** (27-30) | Cross-sectional case-control (2003) | 1 | 0 | 1 | 1 | 1 | 1 | 1 | 0 | 6/9 |
| Cross-sectional (2005) | 1 | 0 | 1 | NA | NA | 2 | 1 | NA | 5/6 |
| Case-control(2007) | 1 | 0 | 1 | 1 | 2 | 1 | 1 | 0 | 7/9 |
| Case-control(2007) | 1 | 0 | 1 | 1 | 2 | 1 | 1 | 0 | 7/9 |
| **Andriantseheno et al., 2004** (31) | Cross-sectional | 1 | 1 | 0 | NA | NA | 2 | 0 | NA | 4/6 |
| **Nkwetngam Ndam., 2004 (a) ; Sehoue., 2004 (b) ; Goudjinou., 2004 ©** (32-34) | Cross-sectionnal case-control (2004) | 1 | 1 | 1 | 1 | 2 | 1 | 1 | 0 | 8/9 |
| Cross-sectional (2004) | 1 | 0 | 0 | NA | NA | 2 | 0 | NA | 3/6 |
| Cross-sectional (2004) | 1 | 0 | 0 | NA | NA | 2 | 1 | NA | 4/6 |
| **Nubukpo., 2004** (35) | Case-control | 1 | 0 | 0 | 1 | 1 | 0 | 1 | 0 | 4/9 |
| **Wadgi et al., 2004** (36) | Cohort | 1 | NA | 1 | 0 | 1 | 0 | 1 | 0 | 4/8 |
| **Dent et al., 2005** (37) | Cross-sectional | 1 | 1 | 1 | NA | NA | 2 | 1 | NA | 6/6 |
| **Diagana et al., 2006** (38) | Cross-sectional | 0 | 1 | 0 | NA | NA | 2 | 1 | NA | 4/6 |
| **Ngoungou et al., 2006** (39) | Case control | 1 | 1 | 0 | 2 | 1 | 1 | 1 | 0 | 7/9 |
| **Ngoungou et al., 2006** (40) | Cohort | 1 | 1 | 1 | 1 | 1 | 1 | 1 | 1 | 8/9 |
| **Tran et al., 2006 et 2007** (41,42) | Cross-sectional (2006) | 1 | 0 | 1 | NA | NA | 2 | 1 | NA | 5/6 |
| Case-control (2007) | 1 | 1 | 1 | 0 | 2 | 1 | 0 | 0 | 6/9 |
| **Houinato et al., 2007** (43) | Cross-sectional | 1 | 1 | 0 | NA | NA | 2 | 1 | NA | 5/6 |
| **Ocquet et al., 2007** (44) | Cross-sectional | 0 | 0 | 0 | NA | NA | 2 | 0 | NA | 2/6 |
| **Praud., 2007 ; Mongo., 2008 ; Saphou Damon., 2008** (45-47) | Cross-sectional (2007) | 1 | 0 | 0 | NA | NA | 2 | 1 | NA | 4/6 |
| Cross-sectional (2008) | 1 | 0 | 0 | NA | NA | 2 | 1 | NA | 4/6 |
| Cross-sectional (2008S) | 1 | 0 | 0 | NA | NA | 2 | 1 | NA | 4/6 |
| **Balogou et al., 2007 et 2008** (48,49) | Cross-sectional (2007) | 1 | 0 | 0 | NA | NA | 2 | 1 | NA | 4/6 |
| Cross-sectional (2008) | 1 | 0 | 0 | NA | NA | 2 | 1 | NA | 4/6 |
| **Crépin et al., 2007 (a) ; Rafael et al., 2010 (b)** (50,51) | Case-control (2007) | 1 | 1 | 1 | 1 | 2 | 0 | 1 | 1 | 8/9 |
| Cross-sectional (2010) | 1 | 0 | 0 | NA | NA | 2 | 1 | NA | 4/6 |
| **Prischich et al., 2008** (52) | Cross-sectional | 1 | 0 | 0 | NA | NA | 2 | 1 | NA | 4/6 |
| **Mbelesso et al., 2009** (53) | Cross-sectional | 1 | 1 | 0 | NA | NA | 1 | 1 | NA | 4/6 |
| **Preux et al., 2011; Bhalla., 2012 ; Bhalla et al., 2013** (54-56) | Cross-sectional (2011) | 1 | 1 | 1 | NA | NA | 2 | 1 | NA | 6/6 |
| Cross-sectional (2012) | 1 | 1 | 1 | NA | NA | 2 | 1 | NA | 6/6 |
| Cohort (2013) | 1 | NA | 1 | 0 | 1 | 0 | 1 | 0 | 4/8 |
| **Lekoubou et al., 2012** (57) | Case control | 1 | 1 | 0 | 1 | 1 | 0 | 1 | 0 | 5/9 |
| **Millogo et al., 2012 (a) ; Nitiéma et al., 2012 (b)** (58,59) | Cross-sectional (Millogo) | 1 | 0 | 0 | NA | NA | 2 | 1 | NA | 4/6 |
| Prevalence case-control (Nitiéma) | 1 | 0 | 1 | 1 | 2 | 1 | 1 | 1 | 8/9 |
| **Yemadje et al., 2012** (60) | Cross-sectional | 1 | 1 | 1 | NA | NA | 2 | 1 | NA | 6/6 |
| **Adoukonou et al., 2013** (61) | Cross sectionnal | 1 | 1 | 0 | NA | NA | 2 | 1 | NA | 5/6 |
| **Doumbia-Ouatarra et al., 2013** (62) | Cross sectionnal | 1 | 1 | 0 | NA | NA | 2 | 1 | NA | 5/6 |
| **Elliott et al., 2013** (63) | Case control | 1 | 1 | 1 | 1 | 2 | 1 | 1 | 0 | 8/9 |
| **Harimanana et al., 2013** (64) | Cross sectionnal | 1 | 1 | 0 | NA | NA | 1 | 1 | NA | 4/6 |
| **Houinato et al., 2013** (65) | Cross sectionnal | 1 | 1 | 1 | NA | NA | 2 | 1 | NA | 6/6 |
| **Maiga et al., 2013** (66) | Cross sectionnal | 0 | 0 | 0 | NA | NA | 1 | 0 | NA | 1/6 |
| **Ngugi et al., 2013** (67) | Case control and cross sectionnal | 1 | 1 | 1 | 1 | 2 | 1 | 1 | 0 | 8/9 |
| **Kuate-Tegueu et al., 2014** (68) | Case control | 1 | 1 | 1 | 0 | 2 | 0 | 0 | 0 | 5/9 |
| **Maiga et al., 2014** (69) | Cross sectionnal | 1 | 1 | 1 | NA | NA | 1 | 1 | NA | 5/6 |
| **Chivorakul., 2015** (70) | Cross-sectionnal | 0 | 0 | 0 | NA | NA | 2 | 1 | NA | 3/6 |
| **Ibinga et al., 2015** (71) | Cross sectionnal | 1 | 0 | 0 | NA | NA | 2 | 1 | NA | 4/6 |
| **Mallum Chindo., 2015** (72) | Cross-sectional | 1 | 1 | 0 | NA | NA | 2 | 1 | NA | 5/6 |
| **Chentouf., 2016** (73) | Case-control | 1 | 0 | 0 | 1 | 2 | 0 | 0 | 0 | 4/9 |
| **Hunter et al., 2016** (74) | Cross-sectional | 1 | 1 | 0 | NA | NA | 1 | 1 | NA | 4/6 |
| **Siqueira et al., 2016** (75) | Cross-sectional | 1 | 1 | 0 | NA | NA | 2 | 1 | NA | 5/6 |
| **Levick et al., 2017** (76) | Case-control | 1 | 1 | 1 | 1 | 2 | 0 | 1 | 0 | 7/9 |
| **Luna et al., 2017** (77) | Cross-sectional | 1 | 1 | 0 | NA | NA | 2 | 1 | NA | 5/6 |
| **Chentouf et al., 2018** (78) | Case-control | 1 | 0 | 0 | 1 | 1 | 0 | 1 | 0 | 4/9 |
| **Chesnais et al., 2018** (79) | Cohort | 1 | 1 | 1 | 1 | 1 | 1 | 1 | 1 | 8/9 |
| **Colebunders et al., 2018 (a,b)** (80,81) | Cross-sectional (DtD) | 1 | 0 | 0 | NA | NA | 2 |  | NA | 3/6 |
| Cross-sectional (Clinic) | 1 | 0 | 0 | NA | NA | 2 | 1 | NA | 4/6 |
| **Lenaerts et al., 2018** (82) | Cross-sectional | 1 | 1 | 0 | NA | NA | 2 | 1 | NA | 5/6 |
| **Mmbando et al., 2018 (a) ; Bhwana., 2019 (b)** (83,84) | Cross-sectional | 1 | 0 | 0 | NA | NA | 2 | 1 | NA | 4/6 |
| Cross-sectional | 1 | 0 | 0 | NA | NA | 2 | 1 | NA | 4/6 |
| **Siewe Fodjo et al., 2018 et 2019 (a,b) ; Boullé et al., 2019 ©** (85-87) | Cross-sectional | 1 | 0 | 1 | NA | NA | 2 | 1 | NA | 5/6 |
| Cross-sectional | 1 | 0 | 1 | NA | NA | 2 | 1 | NA | 5/6 |
| Cross-sectional | 1 | 0 | 1 | NA | NA | 2 | 1 | NA | 5/6 |
| **Adoukonou et al., 2019** (88) | Cohort | NA | NA | 1 | 1 | NA | 1 | 1 | 1 | 5/5 |
| **Mbelesso et al., 2019** (89) | Cross-sectional | 1 | 1 | 0 | NA | NA | 2 | 1 | NA | 5/6 |
| **Mroueh et al., 2019** (90) | Cross-sectional | 1 | 1 | 0 | NA | NA | 2 | 1 | NA | 5/6 |
| **Mukendi et al., 2019 (a) , Siewe Fodjo., 2019 (b)** (91,92) | cross-sectional case-control | 1 | 1 | 1 | 1 | 2 | 1 | 1 | 1 | 9/9 |
| Cross-sectional | 0 | 0 | 1 | NA | NA | 2 | 1 | NA | 4/6 |
| **Sahlu et al., 2019 (a, b)** (93,94) | Cross-sectional | 1 | 0 | 1 | NA | NA | 2 | 1 | NA | 5/6 |
| Cross-sectional | 1 | 0 | 0 | NA | NA | 2 | 1 | NA | 4/6 |
| **Siewe Fodjo et al., 2019** (95) | Cross-sectional | 1 | 1 | 0 | NA | NA | 2 | 1 | NA | 5/6 |
| **Gumisiriza et al., 2020** (96) | Cross sectionnal | 1 | 1 | 1 | NA | NA | 2 | 1 | NA | 6/6 |

In addition to bibliographic search, respondents in the online survey were asked about the sections they have used in the field. Sections use identified from author survey and from bibliographic search were compared using Mac Nemar test for comparison of paired proportions. The significance level was set to 5%. Use of five sections were significantly different comparing the bibliographic search and the online survey.


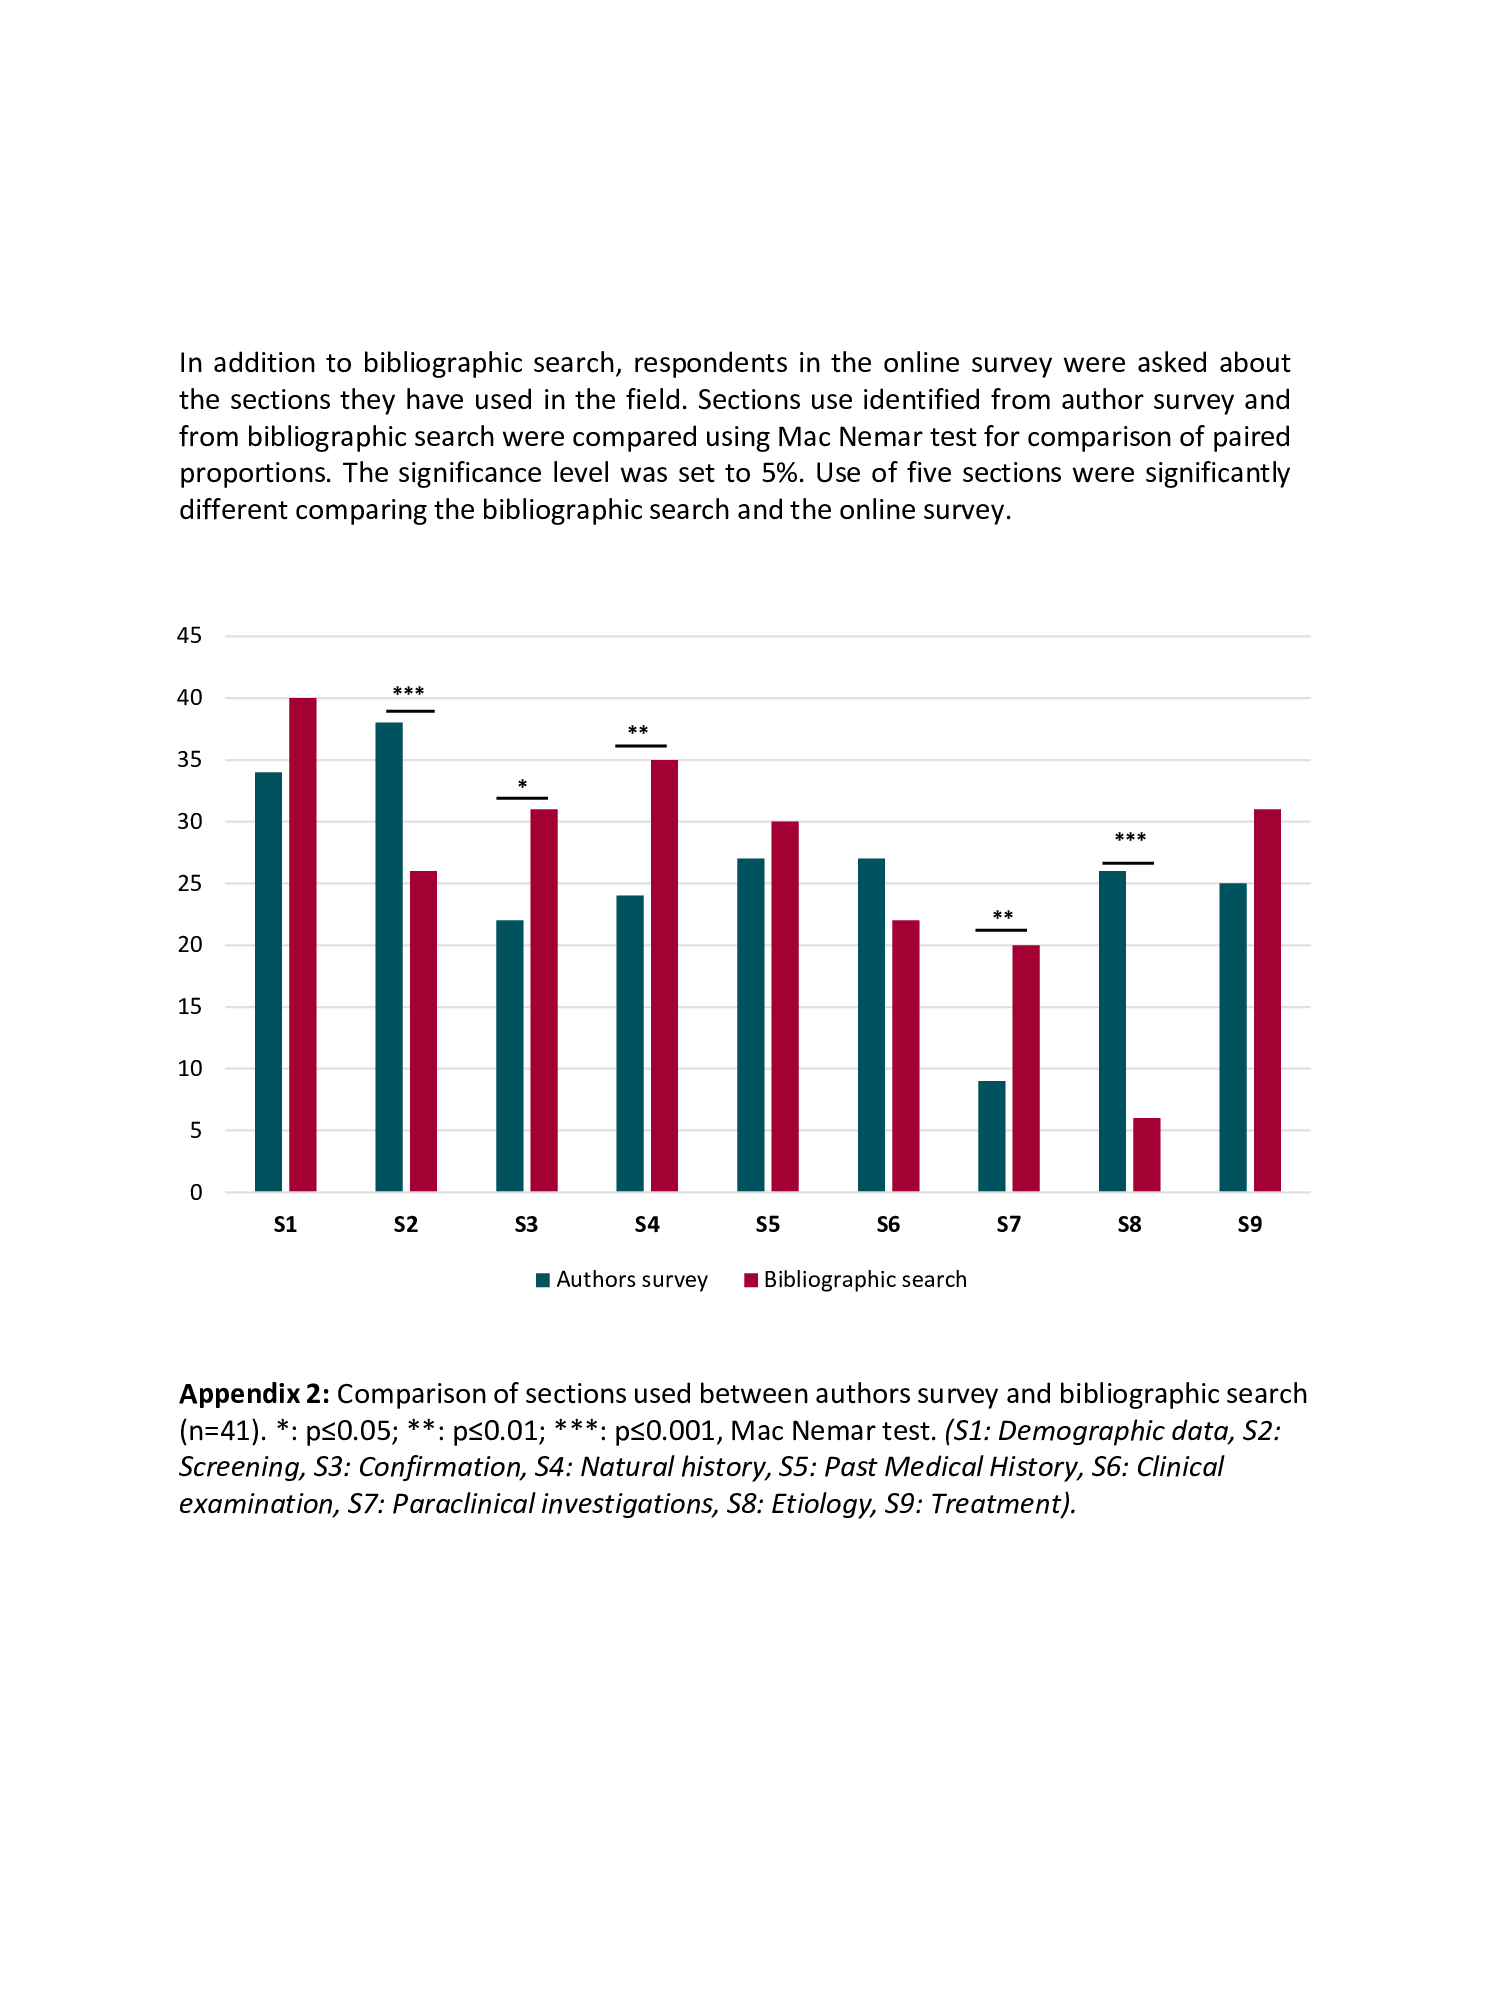


**Appendix 3:** Comparison of sections used between authors survey and bibliographic search (n=41). *: p≤0.05; **: p≤0.01; ***: p≤0.001, Mac Nemar test. *(S1: Demographic data, S2: Screening, S3: Confirmation, S4: Natural history, S5: Past Medical History, S6: Clinical examination, S7: Paraclinical investigations, S8: Etiology, S9: Treatment).*


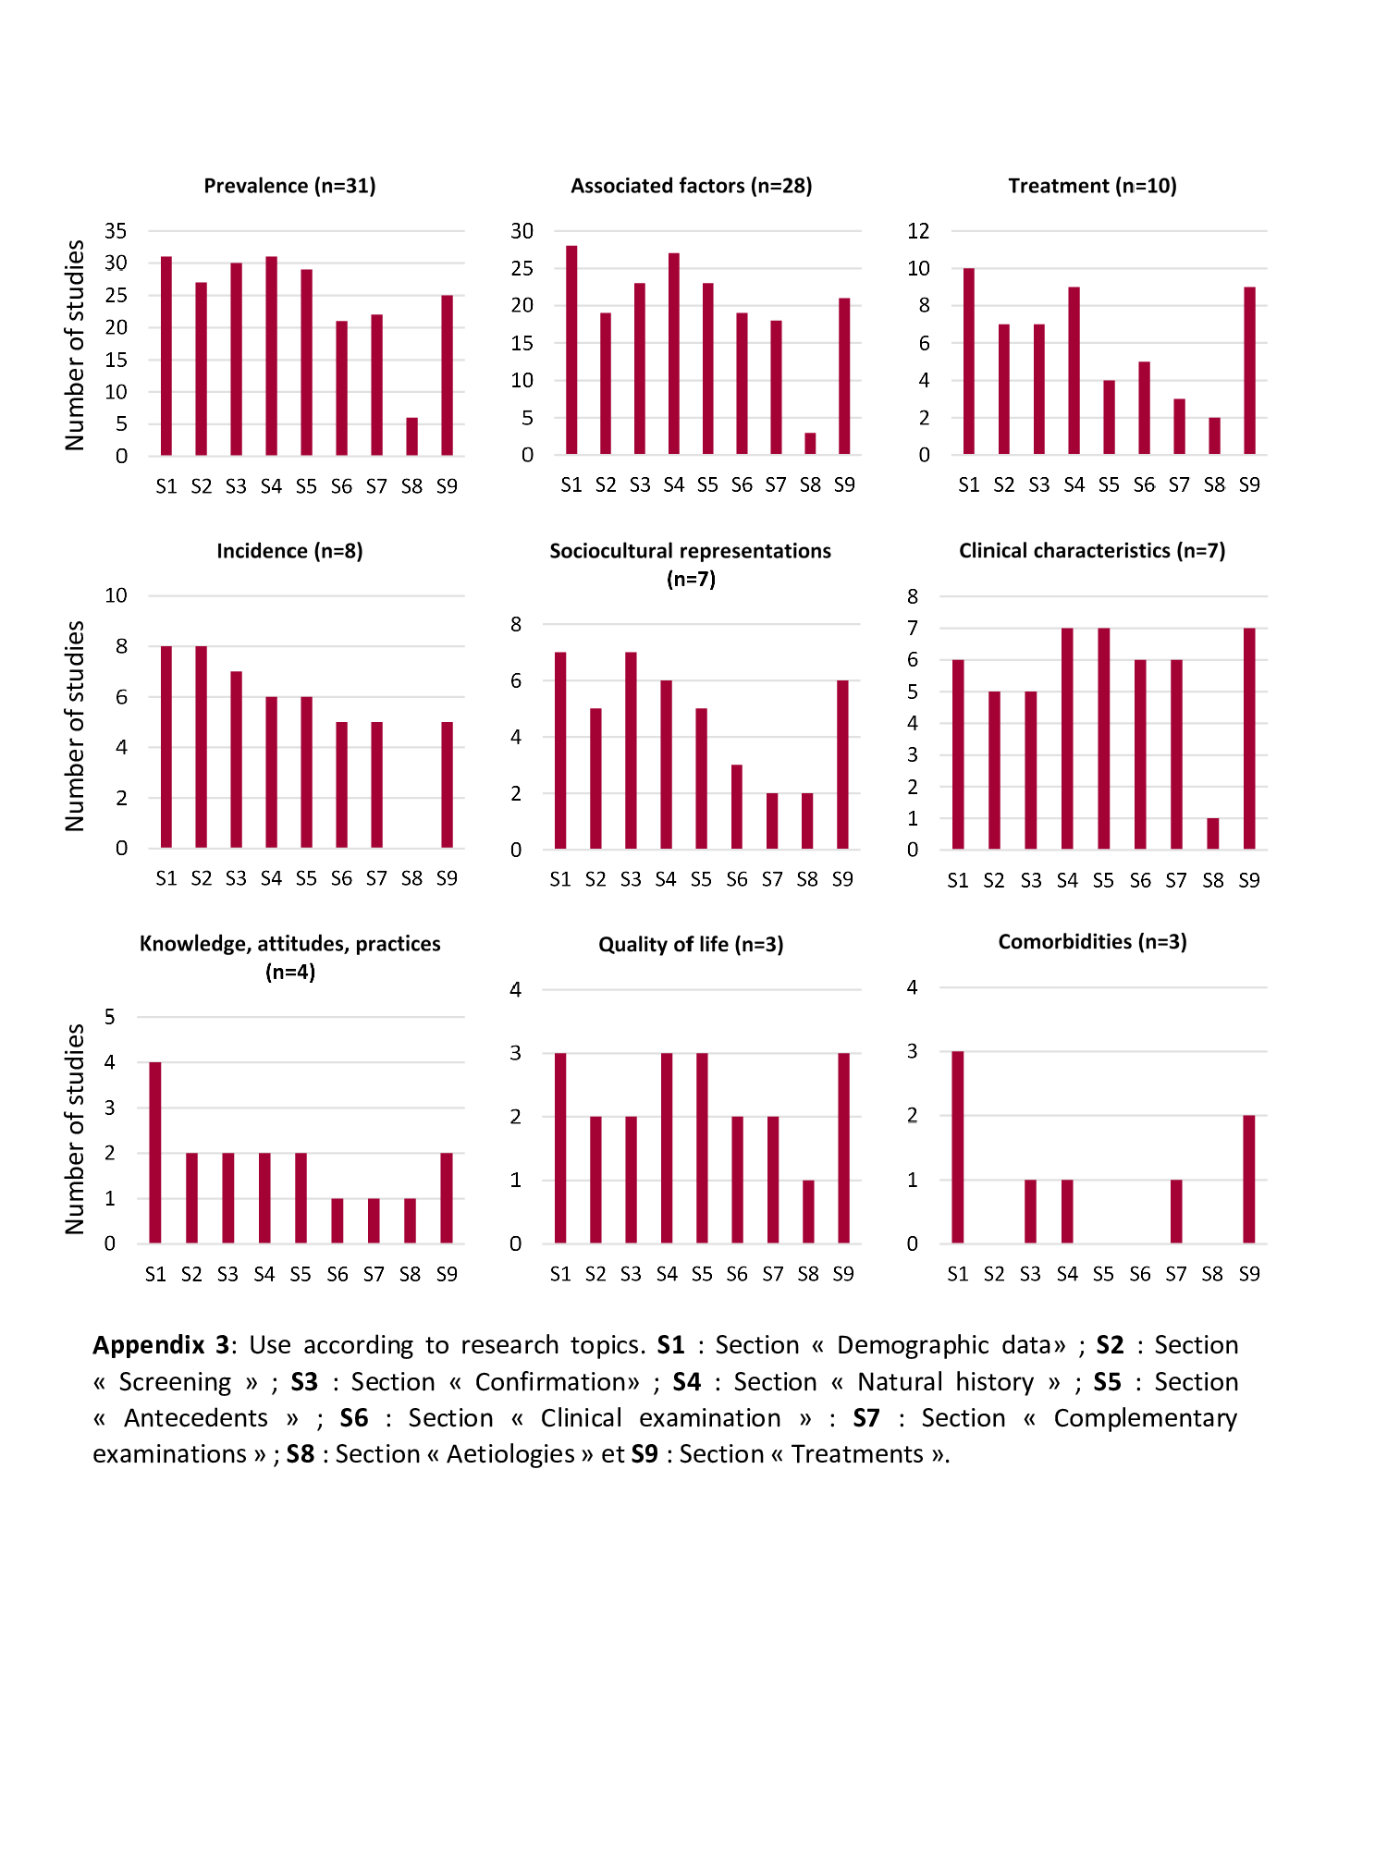


**Appendix 3**: Section used according to research topics. **S1** « Demographic data» section ; **S2**: « Screening » section; **S3** : « Confirmation» section; **S4** : « Natural history » section; **S5** : «Past Medical History » section ; **S6** : « Clinical examination»  section; **S7** : « Paraclinical investigations » section ; **S8** : « Etiology » section et **S9** : « Treatment » section.

**Appendix 4**: Use according to research topics. **S1** : Section « Demographic data» ; **S2**: Section « Screening » ; **S3** : Section « Confirmation» ; **S4** : Section « Natural history » ; **S5** : Section « Antecedents » ; **S6** : Section « Clinical examination » : **S7** : Section « Complementary examinations » ; **S8** : Section « Aetiologies » et **S9** : Section « Treatments ».

**Appendix 5**: Supplementary tools used with the IENT questionnaire

| **CONCOMITANT TOOLS** (n=40) | **USE FREQUENCY (%)**  (n=55) |
| --- | --- |
| **Clinic** |  |
| Data on stroke | 1 (0.02) |
| Anthropometric & bioelectrical impedance measures | 1 (0.02) |
| Genetic profile | 1 (0.02) |
| Rankin scale | 1 (0.02) |
| EEG interpretation schedule | 1 (0.02) |
| Liverpool Seizure Severity Scale (LSSS) | 1 (0.02) |
| Growth retardation criteria | 1 (0.02) |
| **Comorbidities** |  |
| DSM-V | 1 (0.02) |
| Goldberg Anxiety and Depression Scale (GADS) | 3 (0.05) |
| Hamilton Rating Scale for Depression (HRSD) | 1 (0.02) |
| Neurological Disorder Depression Inventory for Epilepsy (NDDI-E) | 2 (0.04) |
| Temperament and Character Inventory (TCI) | 1 (0.02) |
| **Knowledge, attitudes and practices** |  |
| Epileptic disease |  |
| Questionnaire for general population | 3 (0.05) |
| Questionnaire for pupils | 1 (0.02) |
| Questionnaire for parents | 2 (0.04) |
| Questionnaire for people with epilepsy | 2 (0.04) |
| Questionnaire for health care professionals | 1 (0.02) |
| Driving, road accidents & epilepsy |  |
| Questionnaire for inspectors | 1 (0.02) |
| Questionnaire for monitors | 1 (0.02) |
| Questionnaire for driving licence applicants | 1 (0.02) |
| **Screening** |  |
| WHO modified questionnaire | 1 (0.02) |
| Placencia’s questionnaire, 1992 | 1 (0.02) |
| Severe and chronic headache screening questionnaire | 1 (0.02) |
| **Lifestyle habits** |  |
| List of inhabitants to be informed by the head of the family | 1 (0.02) |
| List of eating and hygiene habits to be informed by the mother of the family | 1 (0.02) |
| Food survey | 1 (0.02) |
| **Information, education and communication** |  |
| Health education: washing, brushing and rinsing fruits and vegetables under running water. | 1 (0.02) |
| Sensitization: documents, television, radio, newspapers | 2 (0.04) |
| Training of health professionals | 1 (0.02) |
| **Quality of life** |  |
| QOLIE 10-P | 1 (0.02) |
| QOLIE-31 | 1 (0.02) |
| Questionnaire with 6 subscales: 5 for children (Herranz & Casas' scale, Anxiety & Depression, Hyperactivity & Behavior disorders, Sociability & Cognition and Goodman's questionnaire) and 1 for parents (Hoare & Russell's scale) | 1 (0.02) |
| **Stigma** |  |
| Jacoby scale | 5 (0.10) |
| Explanatory Model Interview Catalogue (EMIC) | 1 (0.02) |
| **Treatment** |  |
| Morisky scale (MMAS-4) | 2 (0.04) |
| Questionnaire on behaviours and attitudes towards medication | 1 (0.02) |
| Questionnaire on treatment accessibility for people with epilepsy | 1 (0.02) |
| Questionnaire on prescribing methods for physicians | 2 (0.04) |
| Questionnaire on anti-epileptic drug stocks, frequency of dispensing, replenishment and methods of dispensing to dispensing pharmacies for pharmacists | 2 (0.04) |
| Questionnaire on therapeutic pathways for traditipractitioners | 1 (0.02) |

**Appendix 6:** “Questionnaire for investigation of epilepsy in tropical counties”

**DEMOGRAPHIC DATA**

D1) Can the subject answer for himself: *(Yes = 1; No = 2)*

D2) If not, who will ? ..............................................................................................

D3) Has a translator been necessary ? *(Yes = 1; No = 2)*

***Personal Status of the subject:***

D4) Surname *(In capital letters)*: ..........................................................................

D5) First Name: ...............................................................................................

D6) Address *(Any information allowing to locate the subject)*:

.......................................................................................................................

D7) Town: .......................................................................................................

D8) Country: ...................................................................................................

D9) Age :

D10) Date of birth: *(DD/MM/YYYY)*

D11) Place of birth: ..........................................................................................

D12) Sex: *(Male = 1; Female = 2)*

D13) Marital status of the subject ?

*(Married = 1; Living with a partner = 2; Living with parents = 3; Living alone = 4; Other = 5; Unknown = 9)*

D14) How long has the subject been living in the study area ?

*(Transiently = 1; For one year = 2; Between 1 and 5 years = 3; Between 5 and 10 years = 4; For more than 10 years = 5;*

*Since birth = 6; Unknown = 9)*

D15) Employment or trade ?

*(Wage earner or civil servant = 1; Craftsman or tradesman = 2; Farmer = 3; Student = 4; Herdsman = 5; Works from home = 6; Unemployed = 7; Labourer = 8; Other = 9)*

D16) If other, specify: ........................................................................................

D17) Living area ?

*(In an urban area = 1; In a rural area = 2; Unknown = 9)*

D18) Sanitation ?

*(In toilets situated in a house = 1; In latrines near the house = 2; In the countryside = 3; Unknown = 9)*

**(Optional answers):**

D19) Ethnic group (specify): .......................................................................................

D20) Religion ?

*(Christian = 1; Muslim = 2; Animist = 3; Buddhism = 4; Hinduism = 5; Other = 6; Unknown = 9)*

D21) If other, specify: ...............................................................................................

**SCREENING**

***For the questions: S1 to S5*** *(Yes = 1; No = 2; Unknown = 9)*

***Does the subject have a history of:***

S1) Loss of consciousness and / or loss of bladder control and / or foam at the mouth ?

S2) Absence(s) or sudden lapse(s) of consciousness during a short time ?

S3) Involuntary clonic movements or muscular jerks of arm(s) and / or leg(s)

(convulsions) that start suddenly and stop within minutes ?

S4) Does the subject sometimes experience sudden and brief bodily sensations,

see or hear things that are not there, or smell strange odours ?

S5) Did someone tell the subject that he / she had epilepsy or that he / she already

had epileptic fits ?

***If at least one answer is yes, the subject must be examined by the medical team***

S6) To conclude, should the subject be examined by the medical team ?

(*Yes = 1; No = 2)*

**EPILEPSY CONFIRMATION**

EC1) Description of the attack(s) (symptoms), which could be an epileptic seizure:

............................................................................................................................

............................................................................................................................

............................................................................................................................

............................................................................................................................

............................................................................................................................

EC2) Could the attack(s) be related to a particular situation or a medical condition * ?

*(Yes = 1; No = 2; Unknown = 9)*

EC3) If yes, specify: ...................................................................................................

EC4) Was at least one of these attacks an epileptic seizure ?

*(Yes = 1; No = 2; Unknown = 9)*

EC5) If not, what was the probable diagnosis ?.................................................................

............................................................................................................................

EC6) If yes, has only one epileptic seizure occurred ?

*(Yes = 1; No = 2)*

**** Examples of particular situations or medical conditions:***

***Febrile convulsions; seizures occurring only during a metabolic or a toxic condition;***

***caused by alcohol; anti-malaria drugs; eclampsia ...***

**NATURAL HISTORY OF THE SEIZURE DISORDER**

N1) Has the subject had any seizure in the last 5 years ?

*(Yes = 1; No = 2; Unknown = 9)*

N2) Age at the first seizure ?

*(During the first 10 days of life = 1; Between 10 days and 6 months = 2; Between 6 months and 2 years = 3; Between 2 years and 6 years = 4; Between 6 years and 12 years = 5; Between 12 years and 20 years = 6; Between 20 years and 40 years = 7; Over 40 years = 8; unknown = 9)*

***For the questions N3 to N14:*** *(Yes = 1; No = 2; Unknown = 9)*

***Does the subject have a history of:***

N3) Generalized tonic and clonic seizures ?

N4) Generalized myoclonic seizures ?

N5) Generalized atonic seizures ?

N6) Absences ?

N7) Other generalized seizures ?

N8) If yes, specify : ..................................................................................................

N9) Simple partial seizures ?

N10) Complex partial seizures ?

N11) Partial seizures with a secondary generalization ?

N12) Another type of seizure (difficult to classify) ?

N13) Status epilepticus ?

N14) Several types of seizures ?

***If several types of seizures: (questions N15 to N17)***

*(Generalized tonic or clonic seizures = 1; Generalized myoclonic seizures = 2;*

*Generalized atonic seizures = 3; Absences = 4; Simple partial seizures = 5;*

*Complex partial seizures = 6; Seizures with a secondary generalization = 7; Other = 9)*

N15) Type of the first seizure ?

N16) Type of the most recent seizures ?

N17) Type of the most frequent seizures ?

N18) Age at the beginning of the second type of seizures ?

*(During the first 10 days of life = 1; Between 10 days and 6 months = 2;*

*Between 6 months and 2 years = 3; Between 2 years and 6 years = 4;*

*Between 6 years and 12 years = 5; Between 12 years and 20 years = 6;*

*Between 20 years and 40 years = 7; Over 40 years = 8; unknown = 9)*

***Precipitating Factors:*** *(Yes = 1; No = 2; Unknown = 9)*

N19) Emotion ?

N20) Alcohol ?

N21) Sleep ?

N22) Lack of sleep ?

N23) Flashing lights (sun on water or through foliage, television screen or disco) ?

N24) Hyperventilation ?

N25) Menstruation ?

N26) Stopping the anti-epileptic drugs ?

N27) Other drugs or toxic agents ?

N28) If yes, specify: ......................................................................................................

N29) Do the seizures occur within one hour of awakening ?

N30) If one or several other precipitating factor(s) exist(s), specify:

...........................................................................................................................

**PAST MEDICAL HISTORY**

P1) What is the subject's order among his siblings ?

P2) Does the patient have a twin brother or a twin sister ?

*(Yes = 1; No = 2; Unknown = 9)*

P3) Consanguinity between parents ?

*(Yes = 1; No = 2; Unknown = 9)*

P4) If yes, specify: .................................................................................................

P5) Does the patient have a family history of epilepsy (parents, grandparents, brothers,

sisters, children, uncles, aunts, cousins) ? *(Yes = 1; No = 2; Unknown = 9)*

P6) If yes, specify the family member(s): ......................................................................

...........................................................................................................................

P7) Family history of other neurological disorders ?

*(Yes = 1; No = 2; Unknown = 9)*

P8) If yes, specify the disorder(s) and the member(s) affected: ...........................................

...........................................................................................................................

P9) Was the pregnancy of the subject's mother normal ?

*(Yes = 1; No = 2; Unknown = 9)*

P10) If not, specify: ................................................................................................

.........................................................................................................................

P11) Did the subject's mother take any drug(s) during her pregnancy ?

*(Yes = 1; No = 2; Unknown = 9*

P12) If yes, specify what drug(s): ..............................................................................

........................................................................................................................

***Delivery (birth of the subject):***

P13) Place of birth of the subject ?

*(At home = 1; Health center = 2; Hospital = 3; Dispensary = 4; Other = 5; Unknown = 9)*

***For the questions P14 to P17:*** *(Yes = 1; No = 2; Unknown = 9)*

P14) Was it long and / or difficult ?

P15) Was it done under epidural or general anesthesia ?

P16) Was it done by caesarean section ?

P17) Were forceps, suction or other mechanical methods used ?

***Birth:***

***For the questions P18 to P19:*** *(Yes = 1; No = 2; Unknown = 9)*

P18) Was the subject a premature delivery ?

P19) Did the subject cry immediately after birth ?

P20) Birth weight ? *(in grams)*

***Feeding:***

P21) What was the method of feeding used when the subject was a baby ?

*(Breast feeding = 1; Bottle feeding = 2; Both = 3; Unknown = 9)*

***Psychomotor development in childhood:***

P22) Was psychomotor development in childhood ?

*(Normal = 1; Abnormal = 2; Unknown = 9)*

P23) If abnormal, specify: ........................................................................................

.........................................................................................................................

***Past medical history:***

***For the questions P24, 25, 27, 30, 32, 35, 36, 39, 42, 44.***

*(Yes = 1; No = 2; Unknown = 9)*

P24) Severe measles ?

P25) Encephalitis or encephalopathy ?

P26) If yes, specify: ...............................................................................................

P27) Meningitis ?

P28) If yes, specify: ...............................................................................................

P29) If other important disease(s), specify: .................................................................

.........................................................................................................................

P30) Is the subject currently in hospital for one or several other causes ?

P31) If yes, specify: ...............................................................................................

........................................................................................................................

P32) ) Head injury with a loss of consciousness before the onset of seizures ?

P33) If yes, specify the type of the trauma: ...............................................................

P34) If yes, how long was it between the trauma and the onset of seizures ?

*(Less than 2 years = 1; More than 2 years = 2; Unknown = 9)*

P35) Prolonged post-traumatic coma ?

P36) Did his epilepsy start after another illness ?

P37) If yes, specify: ...............................................................................................

P38) If yes, how long after this illness ?

*(Less than 2 years = 1; More than 2 years = 2; Unknown = 9)*

P39) Does the patient have neurological sequelae of some disease(s) ?

P40) If yes, what sequelae: ........................................................................................

.........................................................................................................................

P41) If yes, what disease(s): .....................................................................................

.........................................................................................................................

***Intoxication:***

P42) Does the patient, or did he in the past, consume alcohol excessively ?

P43) If yes, specify the duration (in years):

P44) Does the patient abuse drugs ?

P45) If yes, specify the type of drug: ...........................................................................

.....................................................................................................................

P46) If yes, specify the mode of administration: ............................................................

.....................................................................................................................

***Repeated contact with the following animals:***

*(Yes = 1; No = 2; Unknown = 9)*

P47) Dogs or cats ?

P48) Pigs ?

P49) If other, specify: ..............................................................................................

.....................................................................................................................

**CLINICAL EXAMINATION**

CE1) Besides seizures, did the patient experience other health problem(s) ?

*(Yes =1; No = 2; Unknown = 9)*

CE2) If yes, specify: ..................................................................................................

............................................................................................................................

***General examination:***

CE3) What is the general state of health of the subject ?

*(Good = 1; Average = 2; Poor = 3; Unknown = 9)*

CE4) Weight *(in kilograms)* ?

CE5) Height *(in centimeters)* ?

***Neurological examination:***

*(Yes = 1; No = 2; Unknown = 9)*

CE6) Normal neurological exam ?

CE7) If the neurological exam is **abnormal**, what is the exact diagnosis:

............................................................................................................................

CE8) Does the patient have mental retardation ?

*(Yes = 1; No = 2; Unknown = 9)*

CE9) If yes, is this mental retardation ?

*(Slight = 1; Moderate = 2; Severe = 3; Unknown = 9)*

***Examination of other systems:***

***For the questions: CE10 à CE18***

*(Normal = 1; Abnormal = 2; Not done = 3; Unknown = 9)*

CE10) Cardiovascular ?

CE11) Respiratory ?

CE12) Digestive ?

CE13) Endocrine ?

CE14) Genital ?

CE15) Urinary ?

CE16) Ear, nose and throat ?

CE17) Ophthalmological ?

CE18) Dermatological (including burns) ?

CE19) If abnormal exam, specify: ................................................................................

...........................................................................................................................

**PARACLINICAL INVESTIGATIONS**

***Blood investigations***: *(Normal = 1; Abnormal = 2; Not done = 3; Unknown = 9)*

PI1) Full blood count

PI2) If abnormal, specify: .........................................................................................

EI3) Erythrocyte sedimentation rate

PI4) If abnormal, specify: .........................................................................................

PI5) Urea

PI6) If abnormal, specify: .........................................................................................

PI7) Creatinine

PI8) If abnormal, specify: .........................................................................................

PI9) Fasting blood glucose

PI10) If abnormal, specify: .......................................................................................

PI11) Hemoglobin electrophoresis

PI12) If abnormal, specify: .......................................................................................

PI13) If other blood investigationswere done, specify which: ..........................................

........................................................................................................................

PI14) If other blood investigationswere done, specify their results: ..................................

........................................................................................................................

***Neuro-imaging techniques****: (Normal = 1; Abnormal = 2; Not done = 3; Unknown = 9)*

PI15) Skull X-rays ?

PI16) Brain computerized tomography scan ?

PI17) Magnetic Resonance Imaging ?

PI18) If something was abnormal, specify the localization and the type of the abnormality:

.....................................................................................................................

PI19) If other radiological exams were done, specify which: ............................................

......................................................................................................................

PI20) If other radiological exams were done, specify their results: ....................................

......................................................................................................................

***Electroencephalography (EEG)***:

PI21) Was an electroencephalogram done ?

*(Done = 1; Not done = 2; Unknown = 9)*

PI22) Was the EEG done ?

*(During a seizure = 1; Between seizures = 2; Unknown = 9)*

PI23) Was one of these EEGS results abnormal ?

*(Yes = 1; No = 2; Unknown = 9)*

***If at least one EEG was abnormal, describe the most* *significant:***

*(Yes = 1; No = 2; Unknown = 9)*

PI24) Spikes and wave discharges ?

PI25) Generalized 3 per second (or more) spike and wave discharges ?

PI26) Photosensitivity ?

PI27) Focal spikes ?

PI28) Focal slow waves ?

PI29) Generalized spikes and polyspikes ?

PI30) Generalized slow waves ?

PI31) Generalized slowing of background ?

PI32) If something else was abnormal on the EEG, specify what: ................................

.....................................................................................................................

PI33) If something else was abnormal on the EEG, specify where: ...............................

.....................................................................................................................

PI34) Is there a correlation between clinical symptoms and EEG ?

PI35) Specify the most pertinent EEG features that may determine the nature of the epilepsy ?

.....................................................................................................................

***Serology***:

*1st brackets (Normal = 1; Abnormal = 2; Not done = 3; Unknown = 9)*

*2nd brackets (Serum = S; Cerebrospinal fluid = L; Both = B)*

PI36) HIV ? 1 : /___/ 2 : /___/

PI37) Syphilis ? 1 : /___/ 2 : /___/

PI38) Toxoplasmosis ? 1 : /___/ 2 : /___/

PI39) Cysticercosis ? 1 : /___/ 2 : /___/

PI40) Shistosomiasis ? 1 : /___/ 2 : /___/

PI41) If other serologies were done, specify which: ........................................................

.........................................................................................................................

PI42) If other serologies were done, specify their results: ................................................

.........................................................................................................................

***Microbiology****:*

*(bacteria, viruses, parasites)*

PI43) Were microbiological samples taken ?

*(Yes = 1; No = 2; Unknown = 9)*

PI44) If yes, specify: ...............................................................................................

.........................................................................................................................

.........................................................................................................................

.........................................................................................................................

PI45) If abnormal results, specify: .............................................................................

.........................................................................................................................

.........................................................................................................................

.........................................................................................................................

**ETIOLOGY**

E1) Is the cause of epilepsy ?

*(Definite = 1; Suspected = 2; Impossible to say = 9)*

E2) If the cause of epilepsy is definite or suspected, can you classify

this seizure disorder (epilepsy) ?

**Idiopathic** *(which corresponds to a classical syndrome, identified by electro-clinical*

*arguments, with often a strong genetic component) = 1*

**Symptomatic** *(of a past disease ; old lesions with no evolution) = 2*

**Symptomatic** *(of an on-going disease) = 3*

**Cryptogenic** *(epilepsy which can not be classified as symptomatic or idiopathic and*

*does not belong to the syndromes which have a strong genetic component) = 4*

E3) If symptomatic epilepsy, specify:

.................................................................................................................................

.................................................................................................................................

.................................................................................................................................

E4) Give the conclusion of the probable etiology of this epilepsy**:** .............................................

.................................................................................................................................

.................................................................................................................................

.................................................................................................................................

.................................................................................................................................

.................................................................................................................................

.................................................................................................................................

**TREATMENT**

T1) What is or was the type of anti-epileptic treatment taken by the patient ?

*(Traditional = 1; Drugs = 2; Both (1 and 2) = 3; Traditional then drugs (1 then 2) = 4;*

*Drugs then traditional (2 then 1) = 5; None = 6; Unknown = 9)*

T2) If the answer to the question 1 is *4 or 5*, specify the interval between the two types of

treatment *(in months):*

***If traditional treatment****:*

T3) Who prescribed the anti-epileptic treatment ?

*(Prescription by the subject or his family = 1; Sorcerer = 2; Traditional healer = 3;*

*Others = 4; Unknown = 9)*

T4) What is or was the nature of the products used ?

*(Herbal = 1; Animal = 2; Mineral = 3; Mixed = 4; No product used = 5; Unknown = 9)*

T5) What is or was the mode of administration ?

*(Oral = 1; Percutaneous = 2; Scarifications = 3; Amulets = 4; Inhalations = 5; Baths = 6;*

*Prayers or incantations = 7; Others = 8; Unknown = 9)*

T6) Is or was the treatment taken regularly ?

*(Yes = 1; No = 2; Unknown = 9)*

T7) If not, why ?

*(Personal reasons = 1; Drugs not always available = 2; No money to buy drugs = 3;*

*Others = 4; Unknown = 9)*

T8) If other, specify: ....................................................................................................

T9) Treatment efficacy (subject's view) ?

*(Good = 1; Moderate = 2; Bad = 3; None = 4; Unknown = 9)*

T10) Treatment efficacy (family's view) ?

*(Good = 1; Moderate = 2; Bad = 3; None = 4; Unknown = 9)*

T11) Treatment efficacy (Physician’s view) ?

*(Good = 1; Moderate = 2; Bad = 3; None = 4; Unknown = 9)*

***If drug treatment:***

***For the questions: T12 à T21*** *(Yes = 1; No = 2; Unknown = 9)*

T12) Barbiturates ?

T13) Diazepines ?

T14) Phenytoin ?

T15) Carbamazepine ?

T16) Ethosuximide ?

T17) Valproate ?

T18) Vigabatrin ?

T19) Gabapentin ?

T20) Lamotrigine ?

T21) Felbamate ?

T22) Other, specify: .....................................................................................................

T23) Is or was the treatment taken regularly ?

*(Yes = 1; No = 2; Unknown = 9)*

T24) If not, why ?

*(Personal reasons = 1; Drugs not always available = 2; No money to buy drugs = 3;*

*Others = 4; Unknown = 9)*

T25) If other, specify: ..................................................................................................

T26) Treatment efficacy (subject's view) ?

*(Good = 1; Moderate = 2; Bad = 3; None = 4; Unknown = 9)*

T27) Treatment efficacy (family's view) ?

*(Good = 1; Moderate = 2; Bad = 3; None = 4; Unknown = 9)*

T28) Treatment efficacy (Physician’s view) ?

*(Good = 1; Moderate = 2; Bad = 3; None = 4; Unknown = 9)*

T29) Any symptoms experienced since starting anticonvulsant drug treatment ?

*(Not any = 1; Lethargy, drowsiness, somnolence = 2; Ataxia, gait difficulty = 3;*

*Gum hypertrophy = 4; Learning difficulties = 5; Hyperactivity = 6; Skin rash = 7;*

*Others = 8; Unknown = 9)*

T30) Serum anti-epileptic drugs levels ?

*(Done = 1; Not done = 2; Unknown = 9)*

T31) If done, specify: ...................................................................................................

**Appendix 7:** Online survey of authors

**Questionnaire for investigation of epilepsy in tropical countries**

Thank you in advance for the time you will devote to respond to this short survey of your experience with this questionnaire

**PART 1: General information on questionnaire**

**How did you hear about the “Questionnaire for investigation of epilepsy in tropical countries”?**

Please choose all that apply:

- Réseau d'études et de recherches en neurologie tropicale (RERENT) / RERENT network
- Preux et al, Questionnaire d'investigation de l'épilepsie dans les pays tropicaux. Bull Soc Pathol Exot. 2000;93:276-8
- Diagana et al, Dépistage de l'épilepsie en zones tropicales : validation d'un questionnaire en Mauritanie. Bull Soc Pathol Exot. 2006;99:103-7
- Word-of-mouth
- Collaborative work
- Website of the Institute of Epidemiology and Tropical Neurology
- Other:

**If you have colleagues who have used the “Questionnaire for investigation of epilepsy in tropical countries”, I thank you in advance for informing me / giving me their names.**

Please write your answer here: …………………………………………………………………………………………………

**Do you think that the current version of the questionnaire requires updating to include the current knowledge and new technologies?**

Please choose only one of the following: Yes/No

**If yes, do you accept to share your expertise to update this questionnaire with the Delphi method, and then create and valorise (authorship) a new standardized common tool for the scientific community to collect data for the studies on epilepsy in low and middle-income countries?**

Please choose only one of the following: Yes/No

**If some collaborative work on data collected with the “Questionnaire for investigation of epilepsy in tropical countries” is initiated, would you accept to share your dataset and collaborate with other health professionals (physicians, researchers, pharmacists, etc…) in order to create new future projects together?**

Please choose only one of the following: Yes/No

**PART 2: Specific information on the use of the tool during a study** *(renewable if several uses)*

**Title of your research work:**

Please write your answer here: …………………………………………………………………………………………..

**Do you confirm you used the "Questionnaire for investigation of epilepsy in tropical countries" during this work?**

Please choose only one of the following: Yes / No

**Which modules did you use during your survey?**

Please choose all that apply:

- Module 1: Demographic data
- Module 2: Screening
- Module 3: Confirmation
- Module 4: Natural history
- Module 5: Past medical history
- Module 6: Clinical examination
- Module 7: Paraclinical investigations
- Module 8: Etiology
- Module 9: Treatment

**In your experience, what was the average time required to complete the questionnaire? (minutes)**

Please write your answer here (number):

**Do you think that you could have completed your work without the questionnaire?**

Please choose only one of the following: Yes/No

**Did you use the “Questionnaire for investigation of epilepsy in tropical countries” during other work?**

Please choose only one of the following: Yes/No

*(Yes : renewal)*

**Appendix 8:** Feedback from the authors and advice for updating the IENT questionnaire

| **Experience feedback** | **Advice for update** |
| --- | --- |
| Easy to use **(n=3)**  Allows standardization of methods and data collection **(n=3)**  Suitable for non-specialist health care workers (e.g., nurses and health care workers) **(n=3)**  Practical **(n=2)**  Some sections too long **(n=1)** | Addition of the new classification of seizures and epilepsies **(n=3)**  Addition of the new definition of epilepsy **(n=1)**  Update on current knowledge of the disease **(n=1)**  Addition of lifestyle concepts **(n=1)**  Adding other side effects to antiepileptics **(n=1)**  Addition of a tool to assess adherence **(n=1)**  Adapting the tool for a mobile application **(n=1)** |
